# Supplementary material
Source: publisher figshare collection journal article supplement (https://acs.figshare.com/ndownloader/files/3707530)
Supplement: Supplementary file 1 [file 3707530]

## Supporting Information

### Photopolymerization of dienoyl lipids creates planar supported poly(lipid) membranes with retained fluidity

Kristina S. Orosz,<sup>1</sup> Ian W. Jones,<sup>1</sup> John P. Keogh,<sup>1</sup> Christopher M. Smith,<sup>1</sup> Kaitlyn R. Griffin,<sup>1</sup>  
Juhua Xu,<sup>1</sup> Troy J. Comi,<sup>1</sup> H. K. Hall, Jr.<sup>1</sup> and S. Scott Saavedra<sup>1,2\*</sup>

*Department of Chemistry and Biochemistry<sup>1</sup> and BIO5 Institute,<sup>2</sup> University of Arizona, 1306  
East University Boulevard, Tucson, AZ 85721*

---

|                                                                             |     |
|-----------------------------------------------------------------------------|-----|
| 1. Lipid structures                                                         | S-2 |
| 2. Determination of UV polymerization time for PSLBs                        | S-2 |
| 3. Representative structures of linearly polymerized lipids                 | S-4 |
| 4. Comparison of fitting mono- and biexponential models to a recovery curve | S-5 |
| 5. References                                                               | S-6 |

## 1. Lipid structures

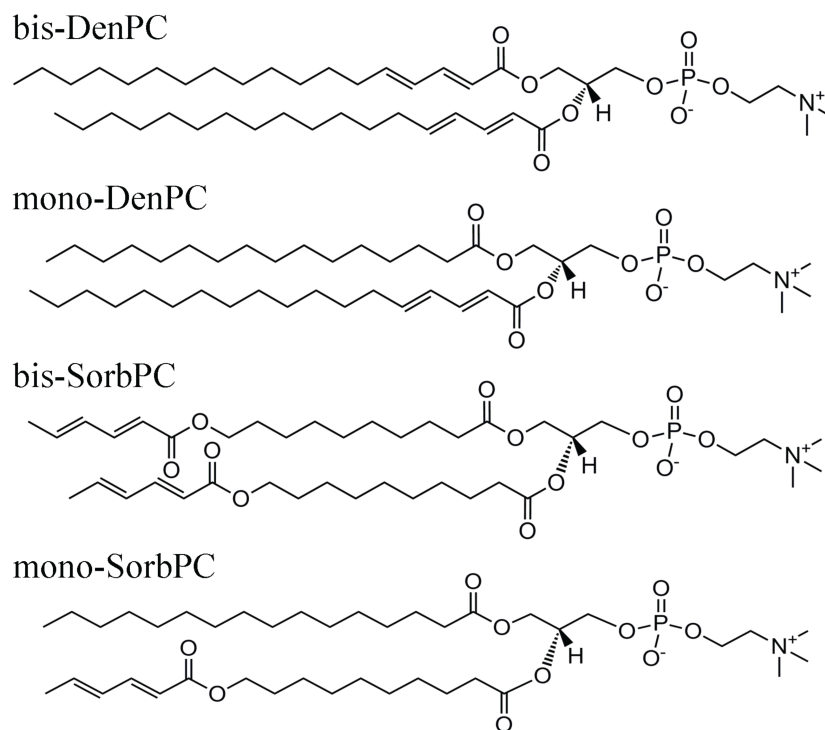

**Figure S1.** Polymerizable lipids.

## 2. Determination of UV polymerization time for PSLBs

To determine the amount of time necessary to polymerize a PSLB composed of dienoil lipids, bis-DenPC vesicles were irradiated with UV light for varying amounts of time and the progress of the reaction was monitored using UV-vis absorbance. The irradiation geometry was identical to that used for UV polymerization of PSLBs.

SUVs were formed by sonication as described in the Experimental section of the article. A glass slide was cleaned as described in the Experimental section and then treated with a silanizing agent, Surfasil Siliconizing Fluid (Thermo Scientific, Dubuque, IA), to minimize vesicle fusion on the glass surface. The slide was mounted into the sample chamber.

For each irradiation time investigated, a pre-irradiation UV spectrum and a post-irradiation UV spectrum were acquired (quartz cuvet, Spectral Instruments 440 spectrophotometer). Immediately after sonication, an aliquot of the SUV solution was used to obtain the pre-irradiation spectrum. Another aliquot of the solution was added to the sample chamber and irradiated using a low pressure Hg pen lamp held ca. 7.6 cm above the sample for a variable amount of time. The irradiated SUV sample was then removed from the sample chamber and the post-irradiation spectrum was measured. Irradiation times were 1, 5, 10, 15, 30, and 60 minutes.

Normalized absorbance spectra are shown in Figure S2. The normalization process follows: Baseline subtraction was performed for all spectra by subtracting the absorbance value at 400 nm from all wavelengths. To normalize the data for each set of pre- and post-polymerization spectra, the pre-polymerization absorbance at 261 nm was set to 1 by determining a normalization factor using

$$\text{normalization factor} = 1/(A_{\text{raw,pre},\lambda_{\text{max}}} - A_{\text{raw,pre},400\text{nm}})$$

where  $A_{\text{raw,pre},\lambda_{\text{max}}}$  is the raw absorbance (before baseline subtraction) at  $\lambda_{\text{max}}$  in the pre-polymerization spectrum and  $A_{\text{raw,pre},400\text{nm}}$  (before baseline subtraction) is the raw absorbance at 400 nm in the pre-polymerization spectrum. The baseline subtracted absorbance at all wavelengths in the pre- and post-polymerization spectra was then multiplied by the normalization factor.

In Figure S2, the disappearance of the band at 261 nm is the result of monomer to polymer conversion.<sup>1</sup> Figure S3 is a plot of the post-polymerization normalized absorbance at 261 nm as a function of irradiation time. After 10-15 minutes, the absorbance reaches a minimum. Thus nearly 100% photopolymerization of dienoyl lipids occurred within 15 min of irradiation which is consistent with previous reports.<sup>2-5</sup> To minimize potential photodegradation of PSLBs and photobleaching of rhodamine-PE, the photopolymerization time was therefore limited to 30 minutes for all UV polymerized PSLBs. No decrease in rhodamine-PE fluorescence intensity was measured after 30 minutes of UV irradiation of doped PSLBs.

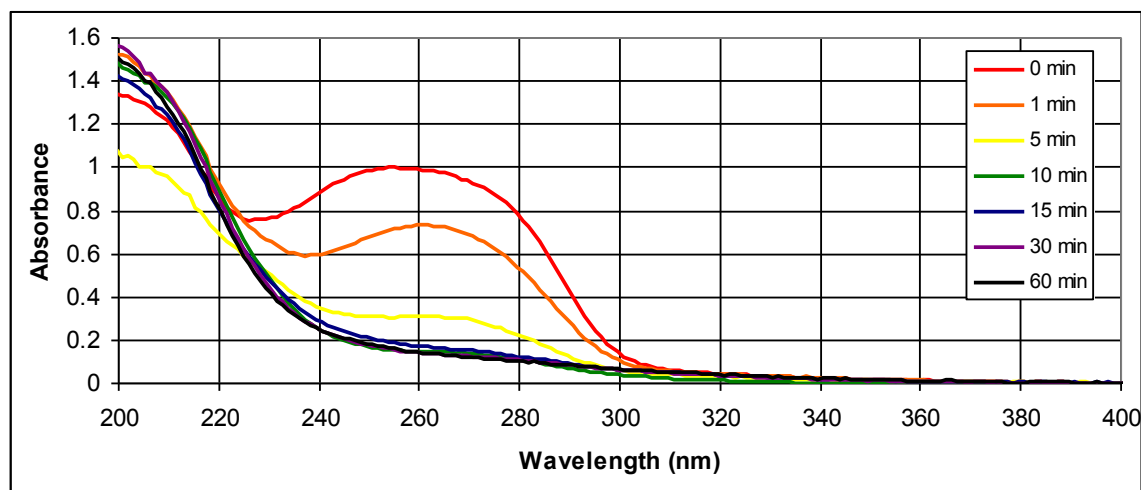

**Figure S2.** Normalized absorbance spectra of bis-DenPC vesicles as a function of UV irradiation time. The 0 min spectrum was taken before irradiation.

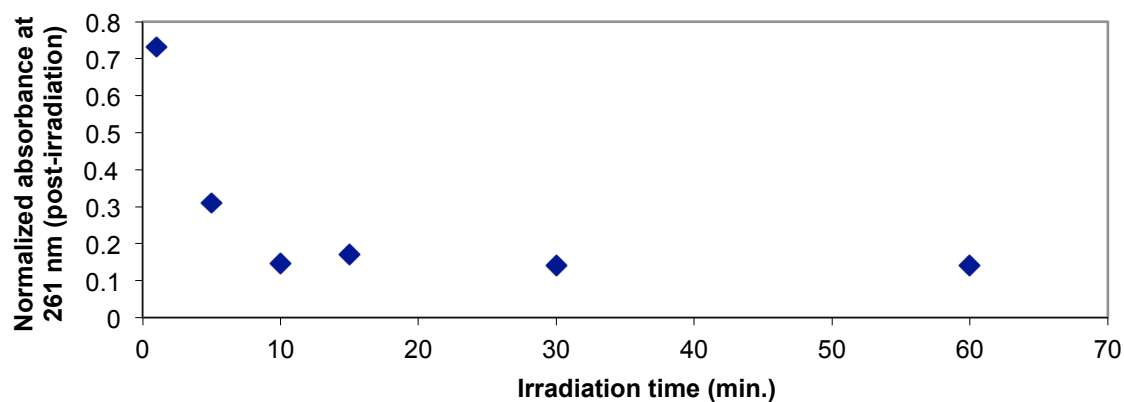

**Figure S3.** Normalized absorbance at 261 nm plotted as a function of UV irradiation time. The non-zero absorbance values at long irradiation times result from the sloped background that is not accounted for by the baseline subtraction procedure.

### 3. Representative structures of linearly polymerized lipids

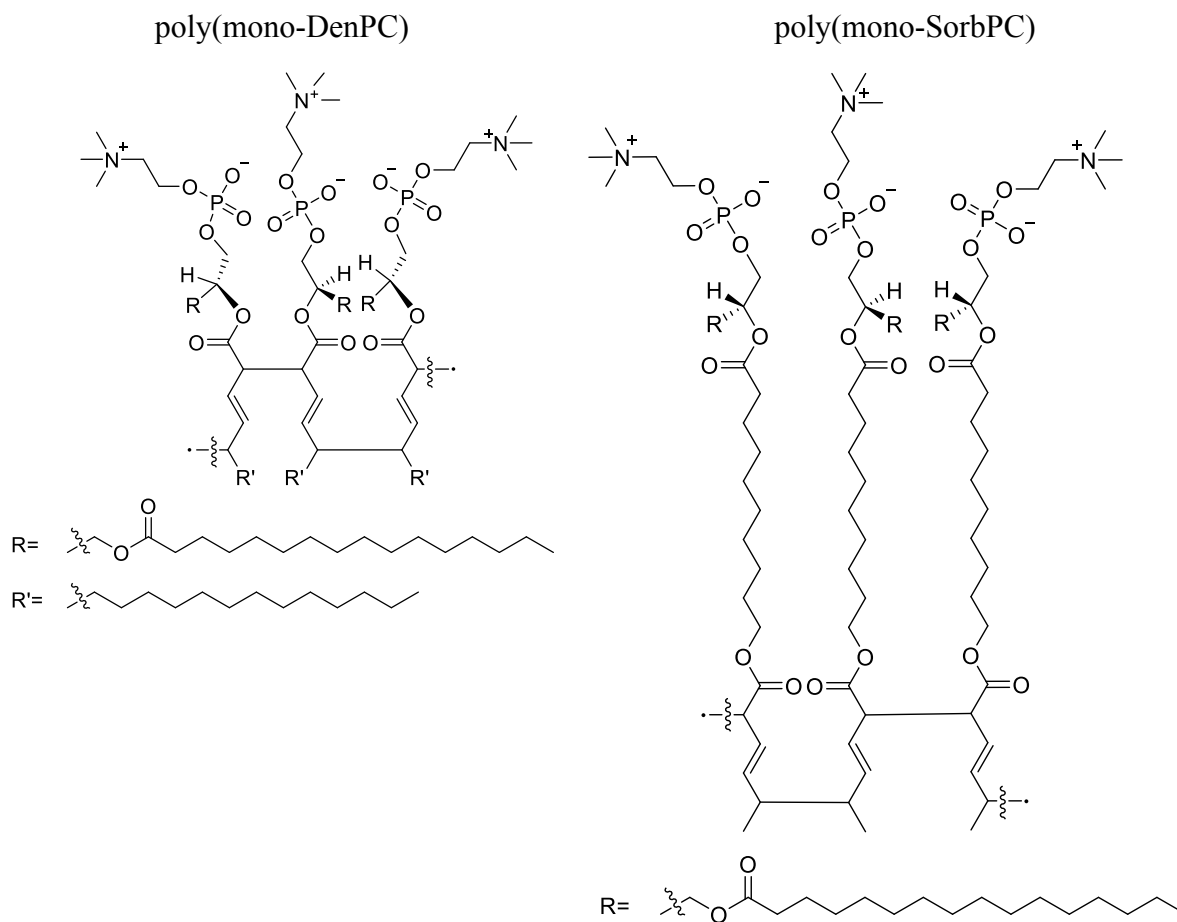

#### 4. Comparison of fitting mono- and biexponential models to a recovery curve

The goodness of fitting a model to a recovery curve was evaluated based on the residuals plot (see examples in Fig. S4) and the adjusted coefficient of determination,  $R_{adj}^2$ ,

$$R_{adj}^2 = 1 - (1 - R^2) \left( \frac{n-1}{n-p} \right)$$

$$R^2 = 1 - \left[ \left( \sum_{i=1}^n (y_i - \hat{y}_i)^2 \right) \left( \sum_{i=1}^n (y_i - \bar{y})^2 \right)^{-1} \right]$$

where  $n$  is the number of data points,  $p$  is the number of variables in the model,  $y_i$  is the fluorescence intensity ratio ( $F(t)$  in eq 1 in the article),  $\bar{y}$  is the mean of  $y_i$ , and  $\hat{y}_i$  is the predicted value of  $y_i$ .

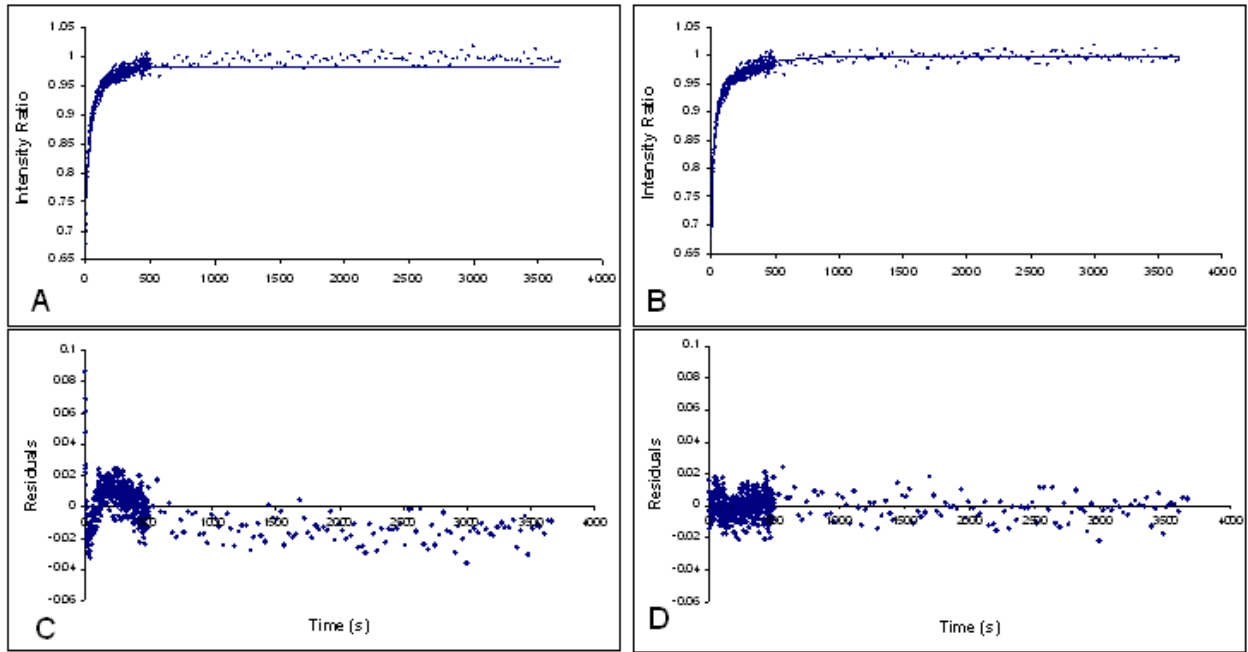

**Figure S4.** FRAP recovery curve for an unpolymerized bis-SorbPC PSLB fit to: (A) a monoexponential model and (B) a biexponential model. Solid lines are the fits to the data. The  $R_{adj}^2$  values in (A) and (B) were 0.9051 and 0.9708, respectively. (C) and (D) show the residuals for the fits in (A) and (B), respectively.

## 5. References

- (1) Liu, S.; O'Brien, D. F. Cross-Linking Polymerization in Two-Dimensional Assemblies: Effect of the Reactive Group Site. *Macromolecules* **1999**, *32*, 5519-5524.
- (2) Conboy, J. C.; Liu, S.; O'Brien, D. F.; Saavedra, S. S. Planar Supported Bilayer Polymers Formed from Bis-Diene Lipids by Langmuir-Blodgett Deposition and UV Irradiation. *Biomacromolecules* **2003**, *4*, 841-849.
- (3) Heitz, B. A.; Xu, J.; Jones, I. W.; Keogh, J. P.; Comi, T. J.; Hall, H. K.; Aspinwall, C. A.; Saavedra, S. S. Polymerized Planar Suspended Lipid Bilayers for Single Ion Channel Recordings: Comparison of Several Dienoyl Lipids. *Langmuir* **2011**, *27*, 1882-1890.
- (4) Ross, E. E.; Rozanski, L. J.; Spratt, T.; Liu, S.; O'Brien, D. F.; Saavedra, S. S. Planar Supported Lipid Bilayer Polymers Formed by Vesicle Fusion. 1. Influence of Diene Monomer Structure and Polymerization Method on Film Properties. *Langmuir* **2003**, *19*, 1752-1765.
- (5) Subramaniam, V.; Alves, I. D.; Salgado, G. F. J.; Lau, P.-W.; Wysocki, R. J.; Salamon, Z.; Tollin, G.; Hruby, V. J.; Brown, M. F.; Saavedra, S. S. Rhodopsin Reconstituted into a Planar-Supported Lipid Bilayer Retains Photoactivity after Cross-Linking Polymerization of Lipid Monomers. *J. Am. Chem. Soc.* **2005**, *127*, 5320-5321.
